# Supplementary material for: Differential responses to immune checkpoint inhibitor dictated by pre-existing differential immune profiles in squamous cell carcinomas caused by same initial oncogenic drivers
Source: Springer Nature journal article supplement (doi:10.1186/s13046-022-02337-x), 2022-04-02
Supplement: MOESM2 [file 20278484]

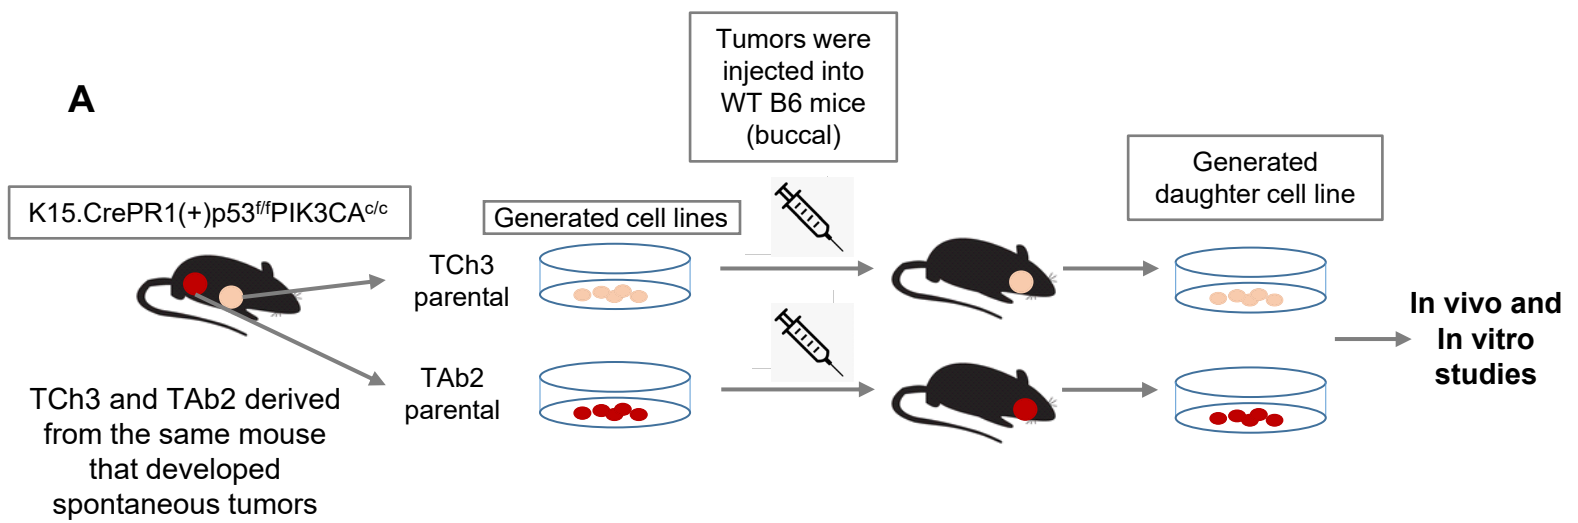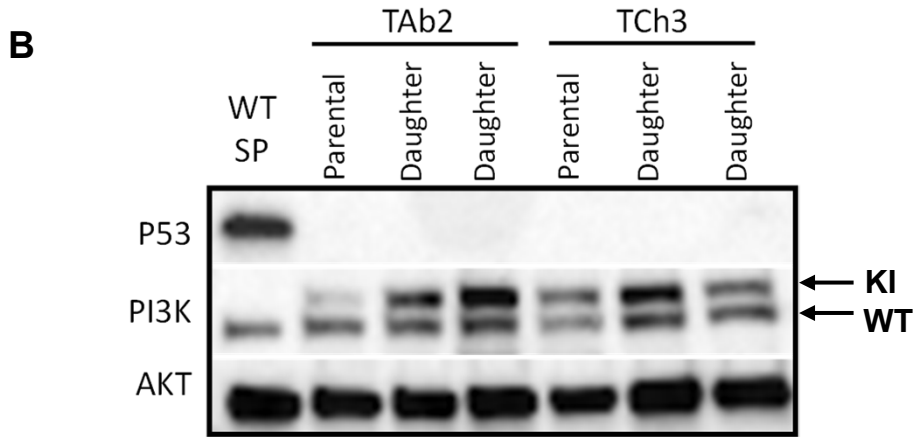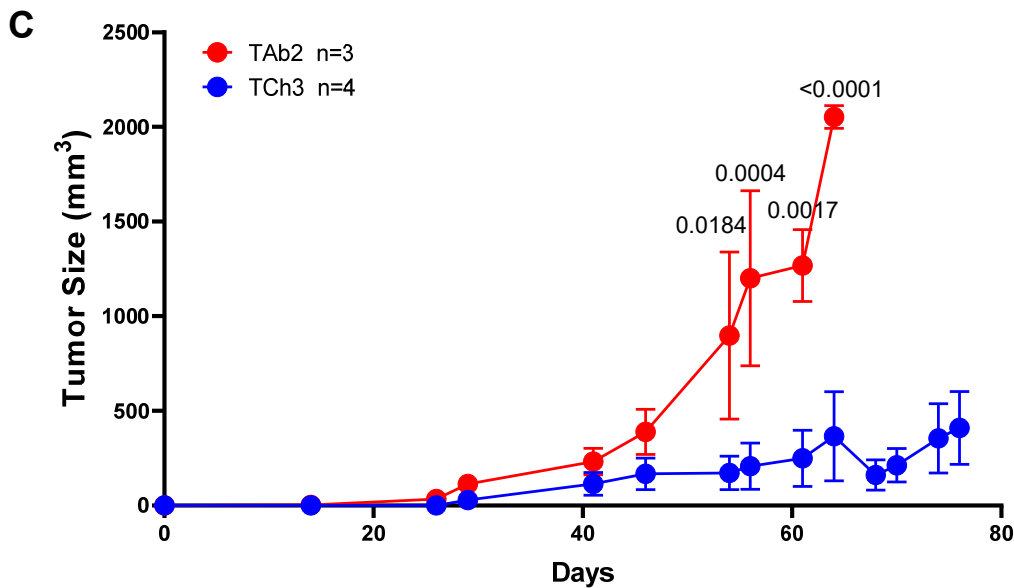

**Figure S1. Establishment of TAb2 and TCh3 models.** (A) Schematic diagram depicting the generation of KPPA tumor cell lines. (B) Western blotting data showing the absence of TP53 protein and the presence of PIK3CA hyperactive allele (KI) that encodes a protein slightly larger than WT PIK3CA protein (WT) in TAb2 and TCh3 parental and daughter cell lines. AKT as loading control. (C) Different tumor growth pattern of TAb2 versus TCh3 tumors. Tumor growth curves for TAb2 (n=3) and TCh3 (n=4) tumors when  $1 \times 10^6$  tumor cells were injected subcutaneously at the flank of WT B6 mice. *P* values are shown for Sidak's multiple comparisons by two-way ANOVA.

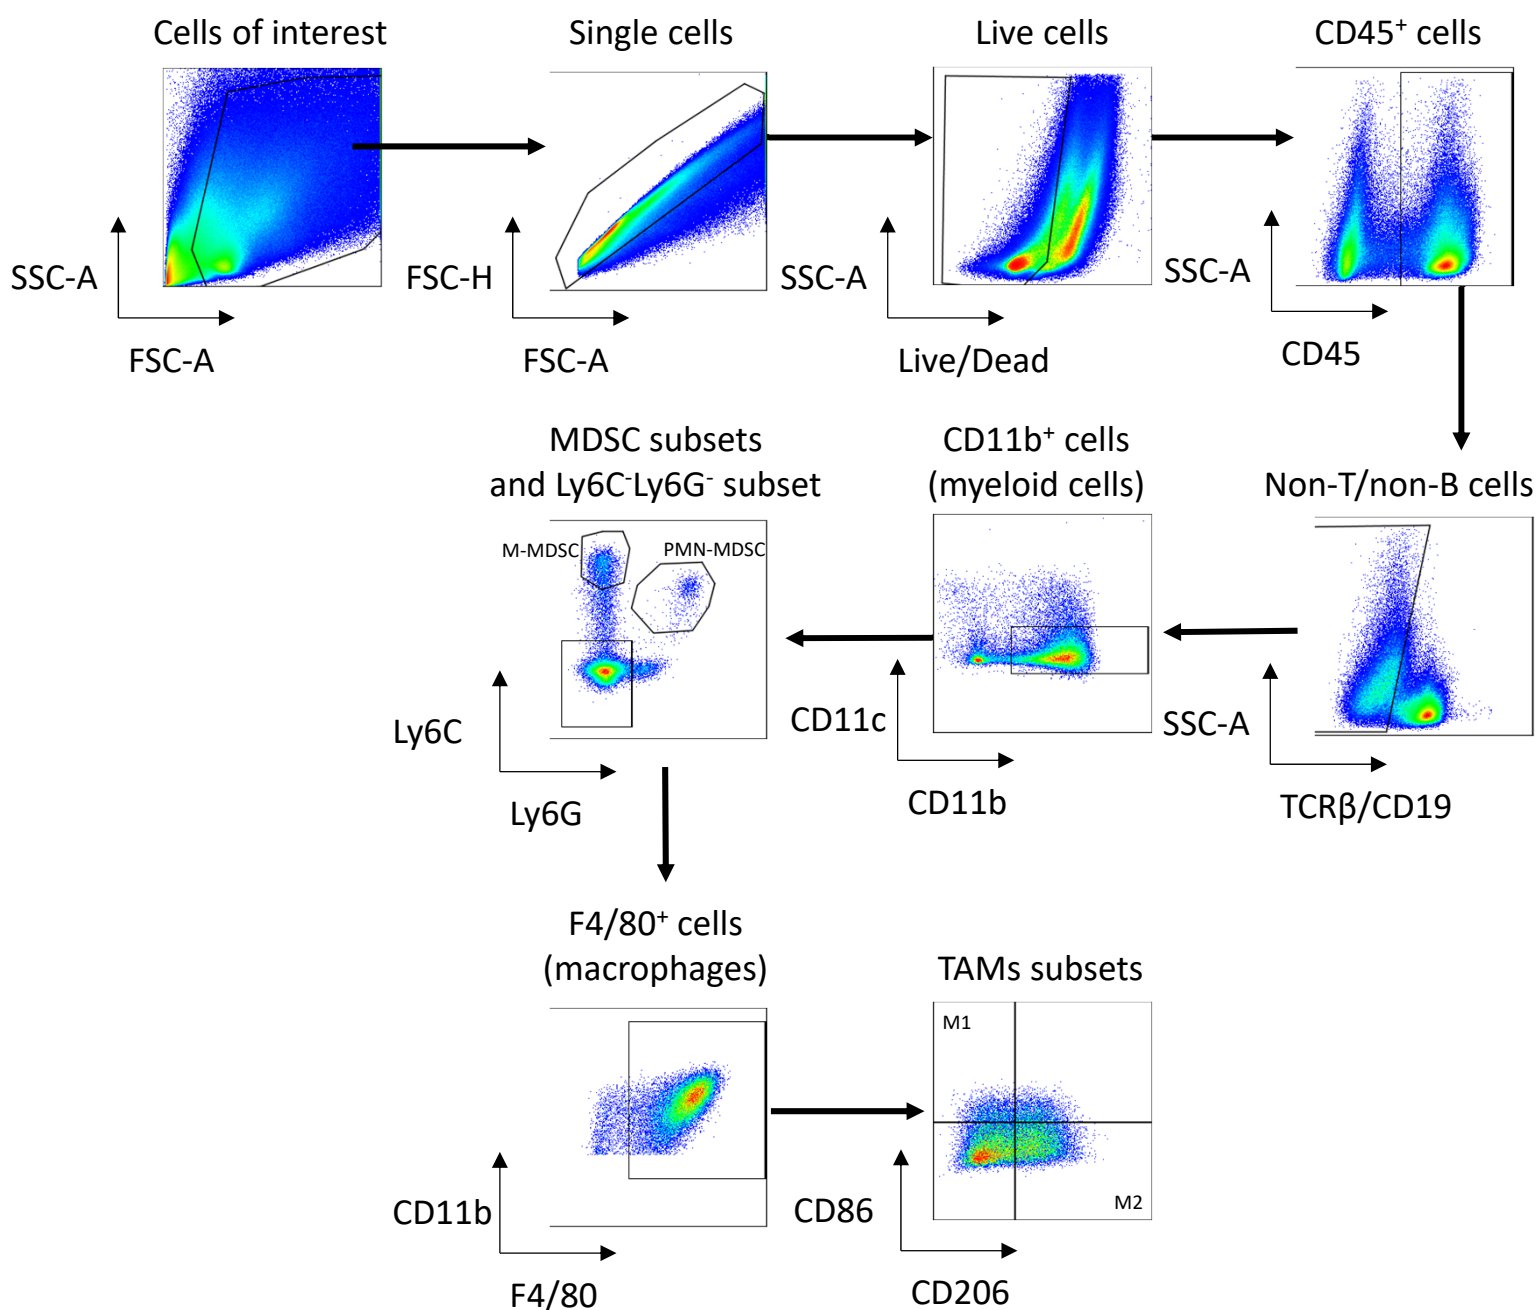

**Figure S2. Gating strategy for different subsets of myeloid cells.** After gating on CD45<sup>+</sup> population, we gated on non-T/non-B population (TCRβ<sup>-</sup>CD19<sup>-</sup>). From the non-T/non-B population, we gated on CD11b<sup>+</sup> population. In the CD11b<sup>+</sup> population, we identified M-MDSC (Ly6C<sup>high</sup>Ly6G<sup>-</sup>) and PMN-MDSC (Ly6C<sup>low</sup>Ly6G<sup>+</sup>). For TAMs, we gated on Ly6C-Ly6G<sup>-</sup> population, then gated on F4/80<sup>+</sup>CD11b<sup>+</sup> population. For M2-TAMs, we gated on F4/80<sup>+</sup>CD11b<sup>+</sup>CD206<sup>+</sup>CD86<sup>-</sup> population.

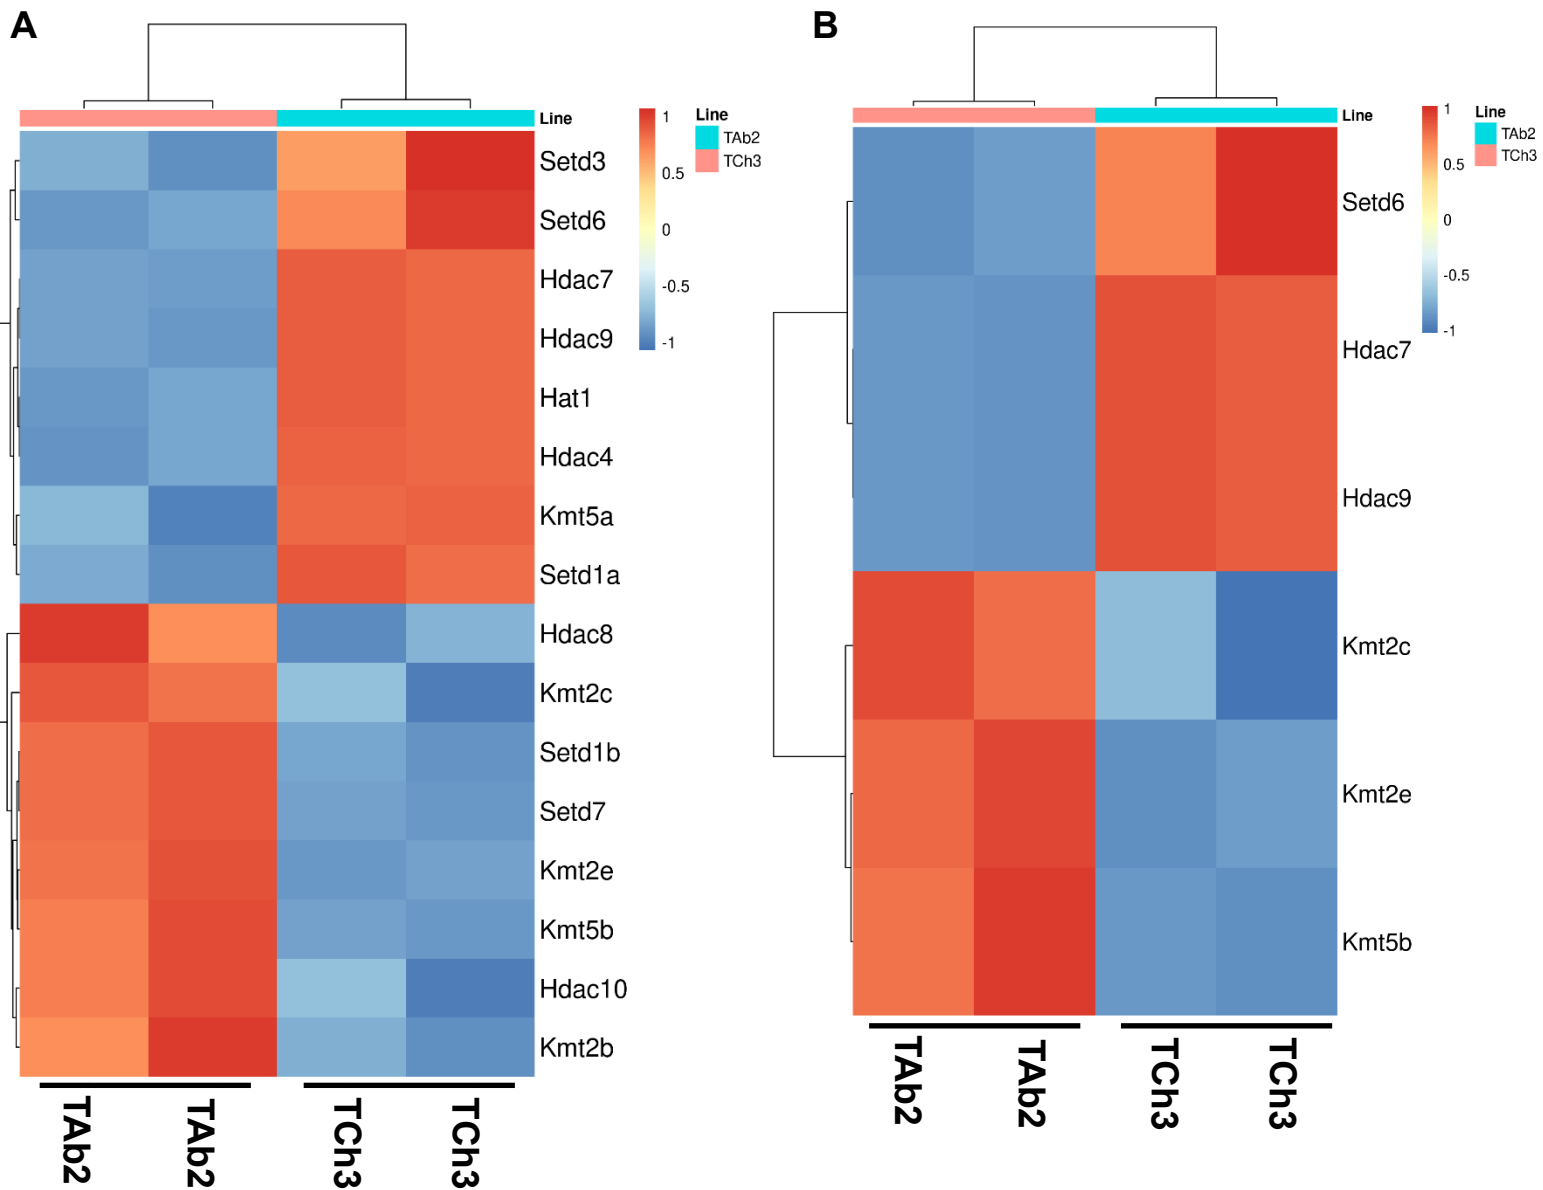

**Figure S3. Heatmap of gene expression of selected epigenetic modulators in bulk RNA-seq data.** Expression values for each gene are scaled across TAB2 (n=2) and TCh3 (n=2) tumor cells. Genes were filtered for those differentially expressed with a threshold of  $\log_2(\text{fold change})=0.58$  (1.5-fold difference) **(A)** or  $\log_2(\text{fold change})=1$  (2-fold difference) **(B)** and BH adjusted p-value=0.05.

## Overlapping mutations in TAb2

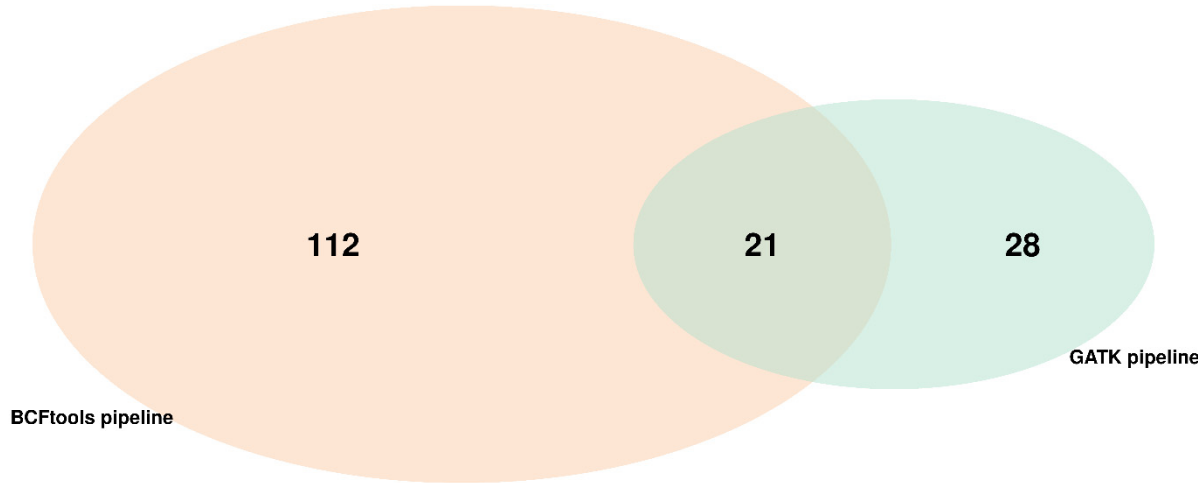

## Overlapping mutations in TCh3

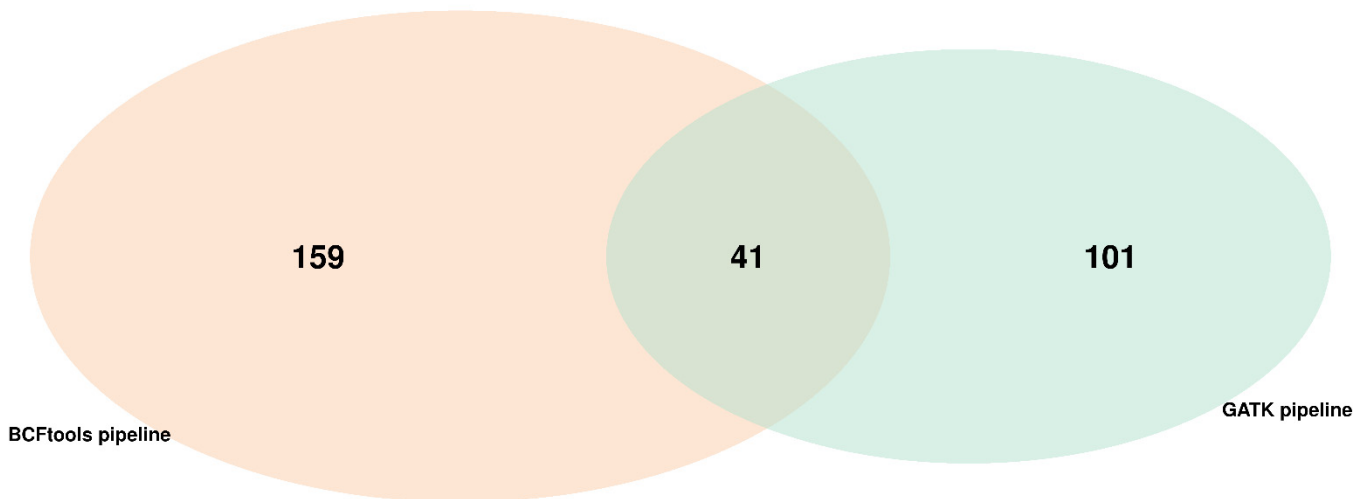

**Figure S4. Somatic mutations identified in TAb2 and TCh3 tumors using both variant calling pipelines.** Venn diagrams of overlapping mutations in TAb2 (top) and TCh3 (bottom) identified by GATK (right, light green) and BCFtools (left, light orange) pipelines in WES data (see details in Method).

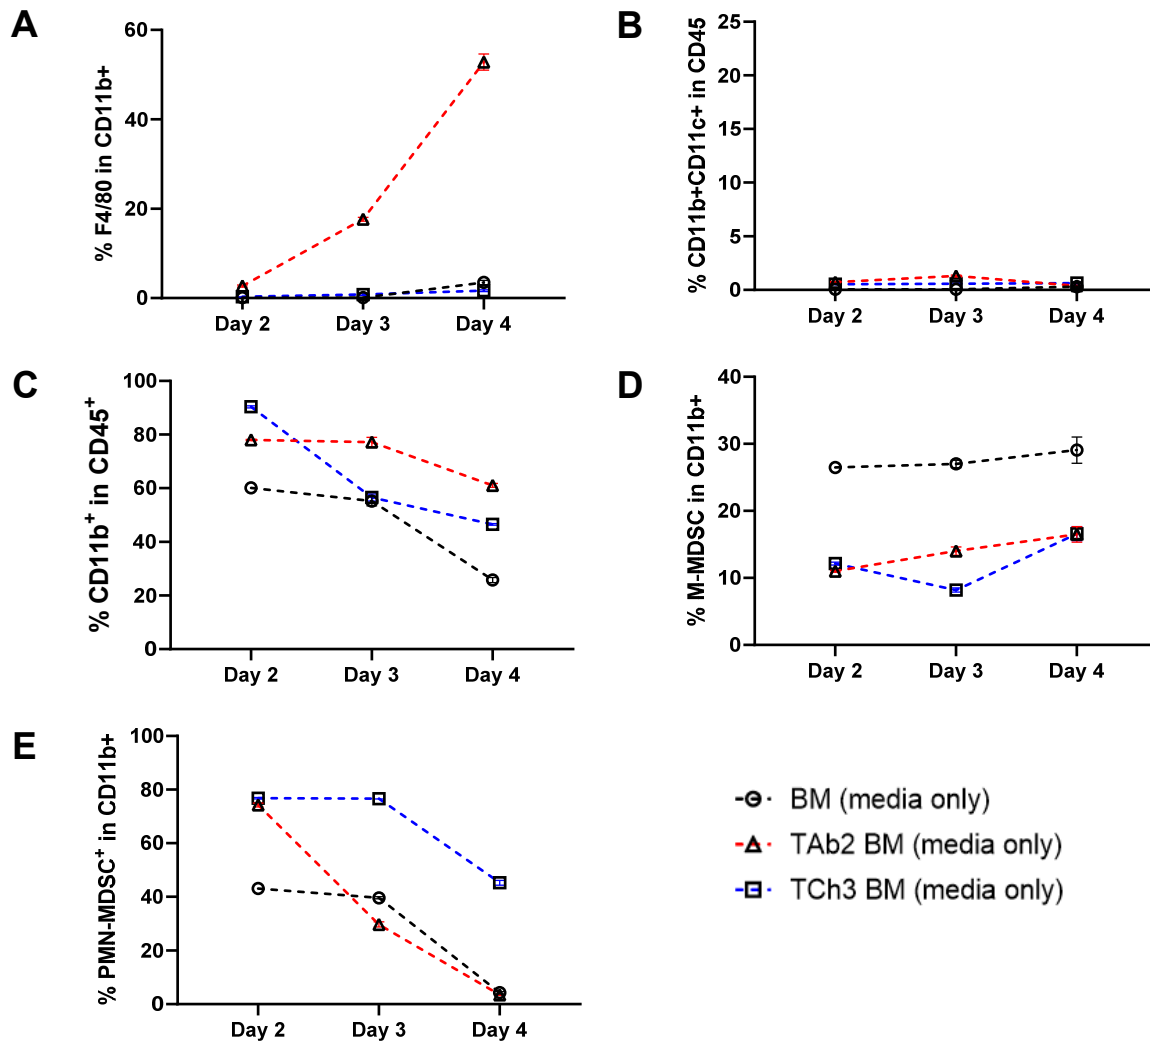

**Figure S5. Growth curves of different myeloid populations upon co-culture of BM cells with Tab2 or TCh3 tumor cells.** The frequencies of each cell type were determined by flow cytometry at different time points of co-culture (Day 2, 3 and 4). The frequency of **(A)** TAMs (CD11b<sup>+</sup>Ly6G<sup>-</sup>Ly6C<sup>-</sup>F4/80<sup>+</sup>), **(B)** dendritic cells (CD11b<sup>+</sup>CD11c<sup>+</sup>), **(C)** myeloid cells (CD11b<sup>+</sup>), **(D)** M-MDSC (CD11b<sup>+</sup>Ly6G<sup>-</sup>Ly6C<sup>hi</sup>), and **(E)** PMN-MDSC (CD11b<sup>+</sup>Ly6G<sup>+</sup>Ly6C<sup>low</sup>). BM alone (black), Tab2-BM (red) and TCh3-BM (blue) co-culture are shown. Results are representative of more than three independent experiments done in triplicates.

**A**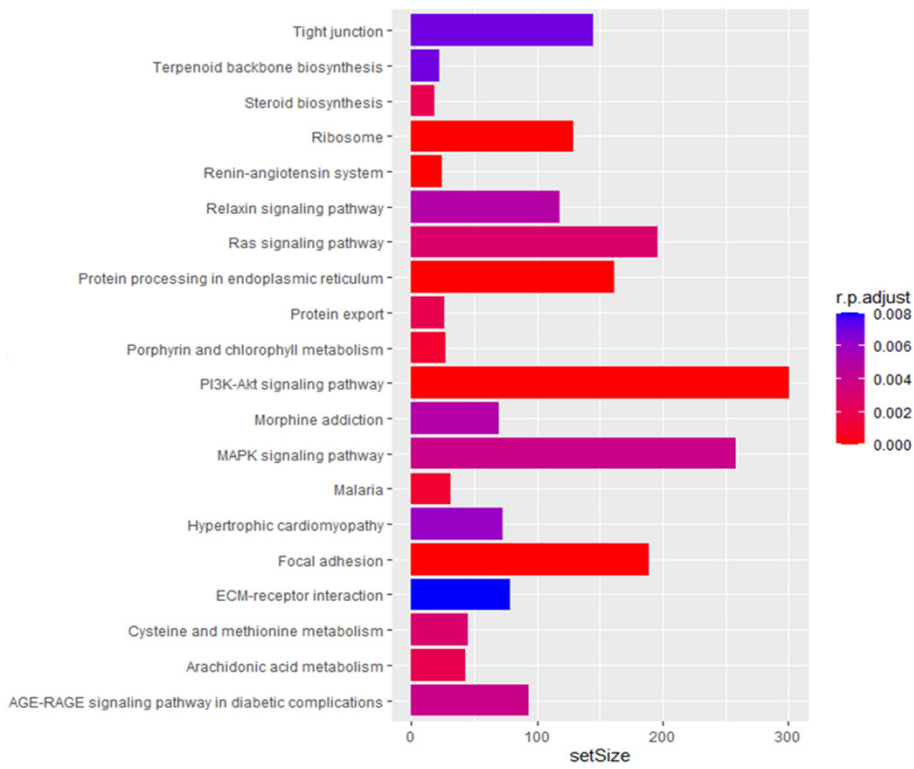**B**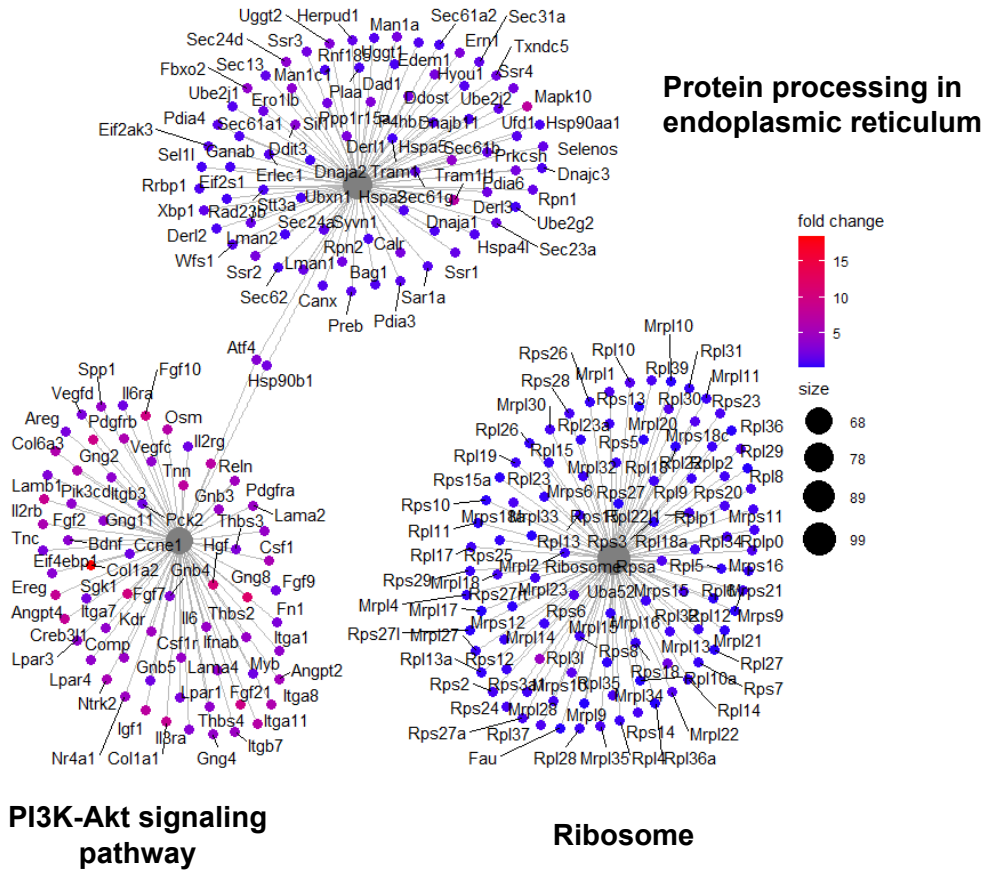**Figure S6A, B**

C

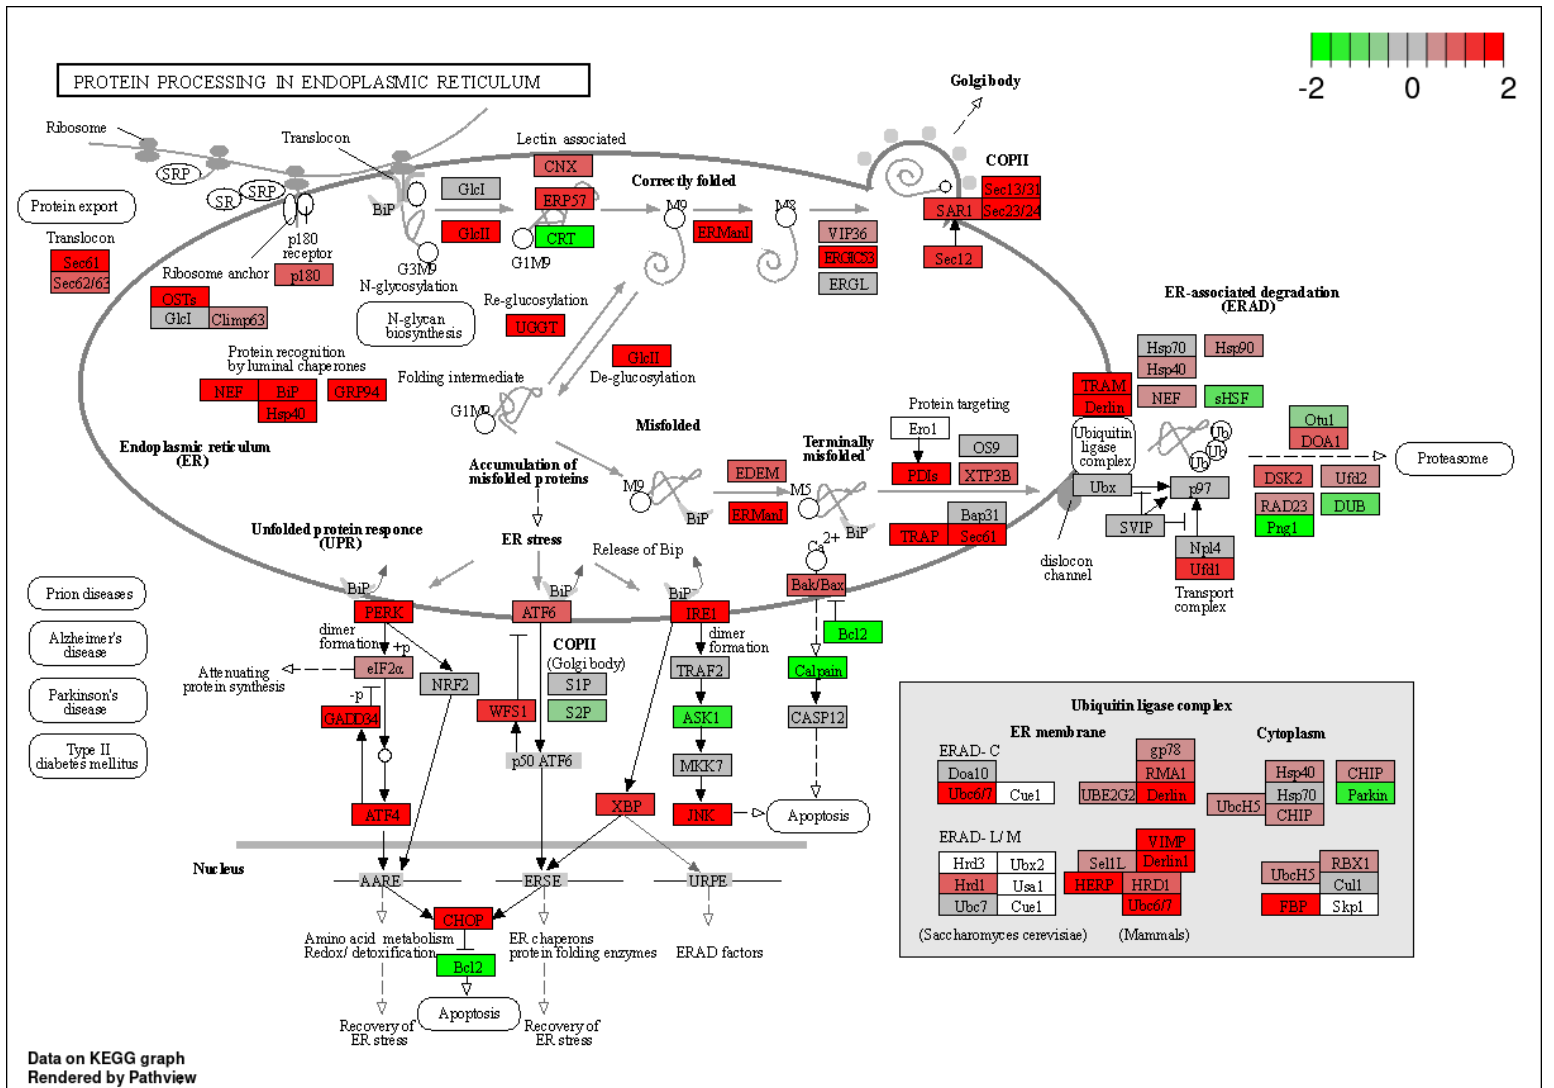

D

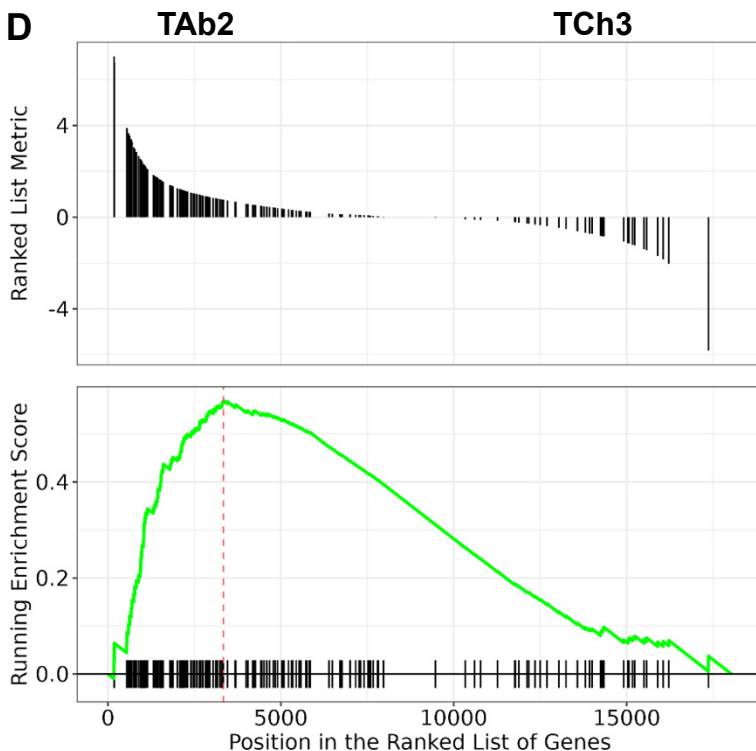

Figure S6C, D

**E**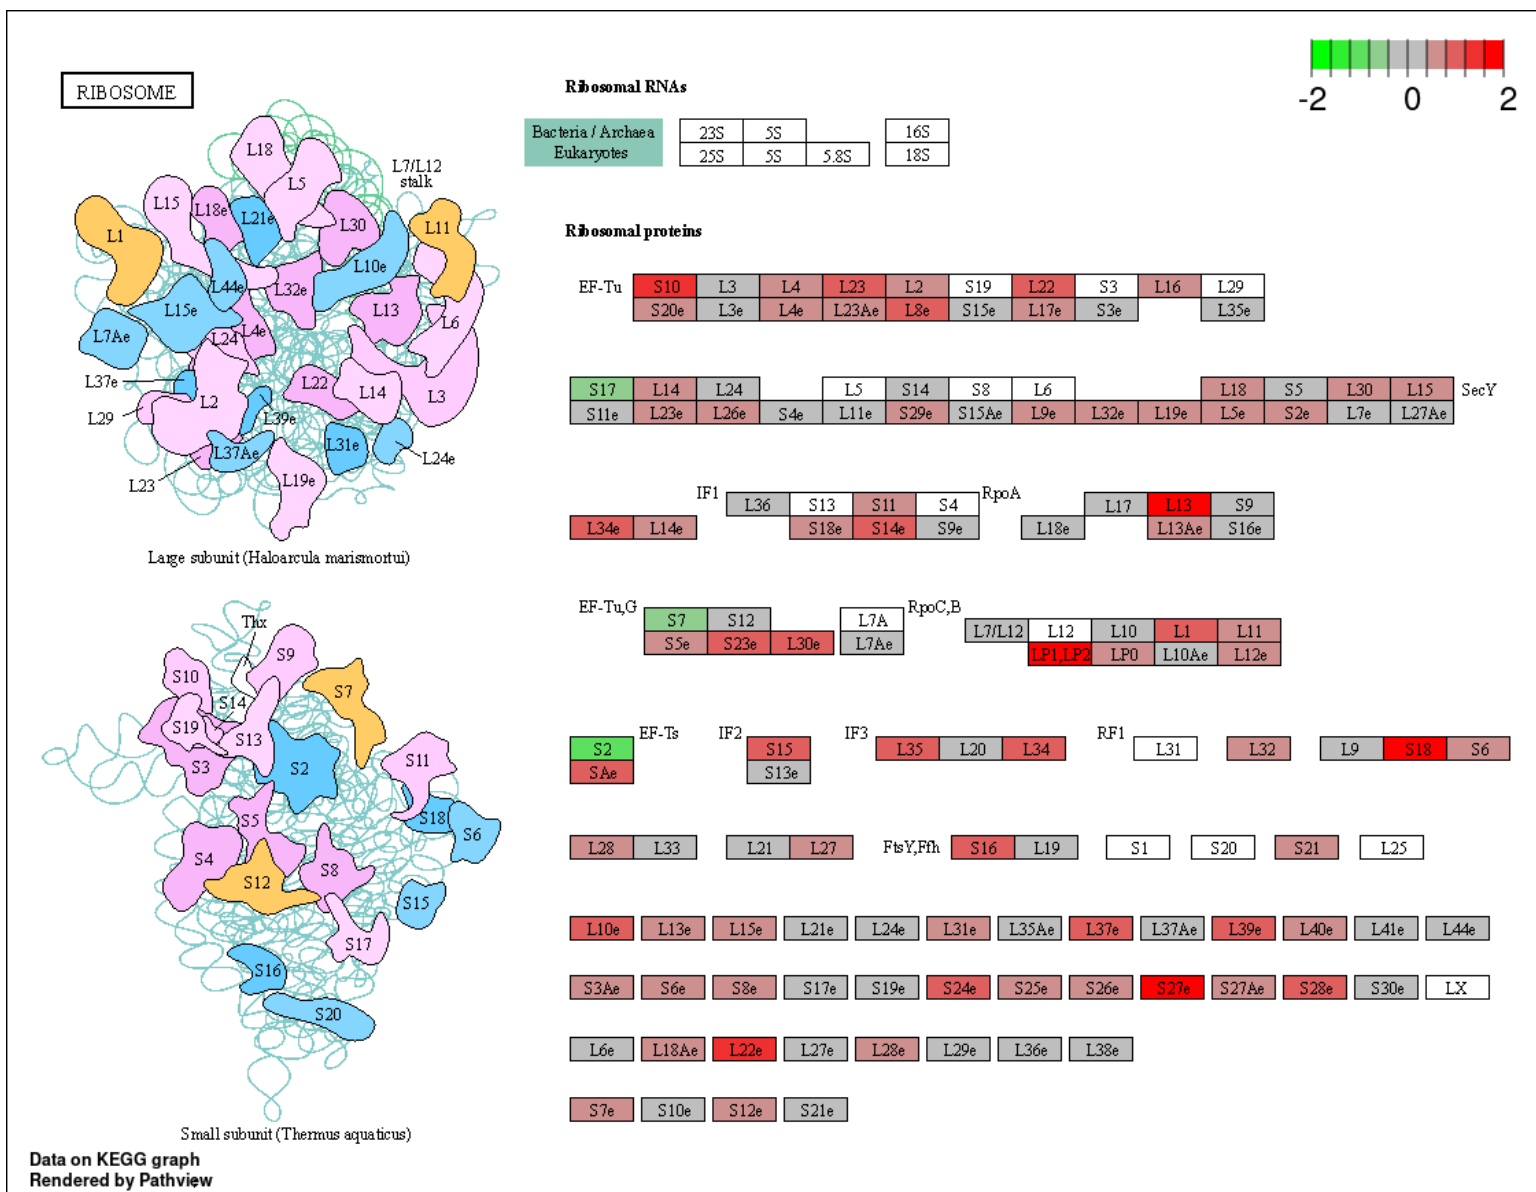**F**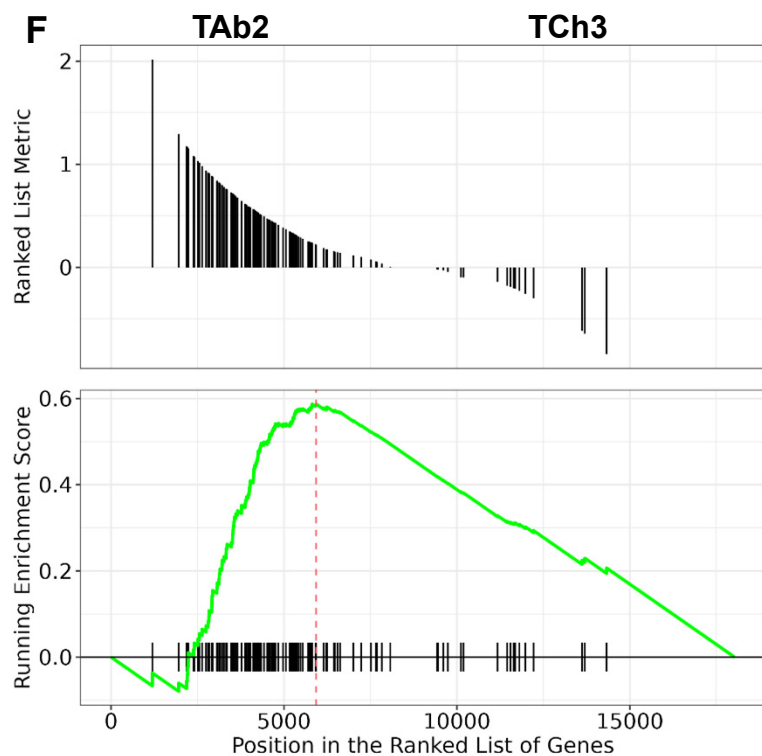**Figure S6E, F**



**G**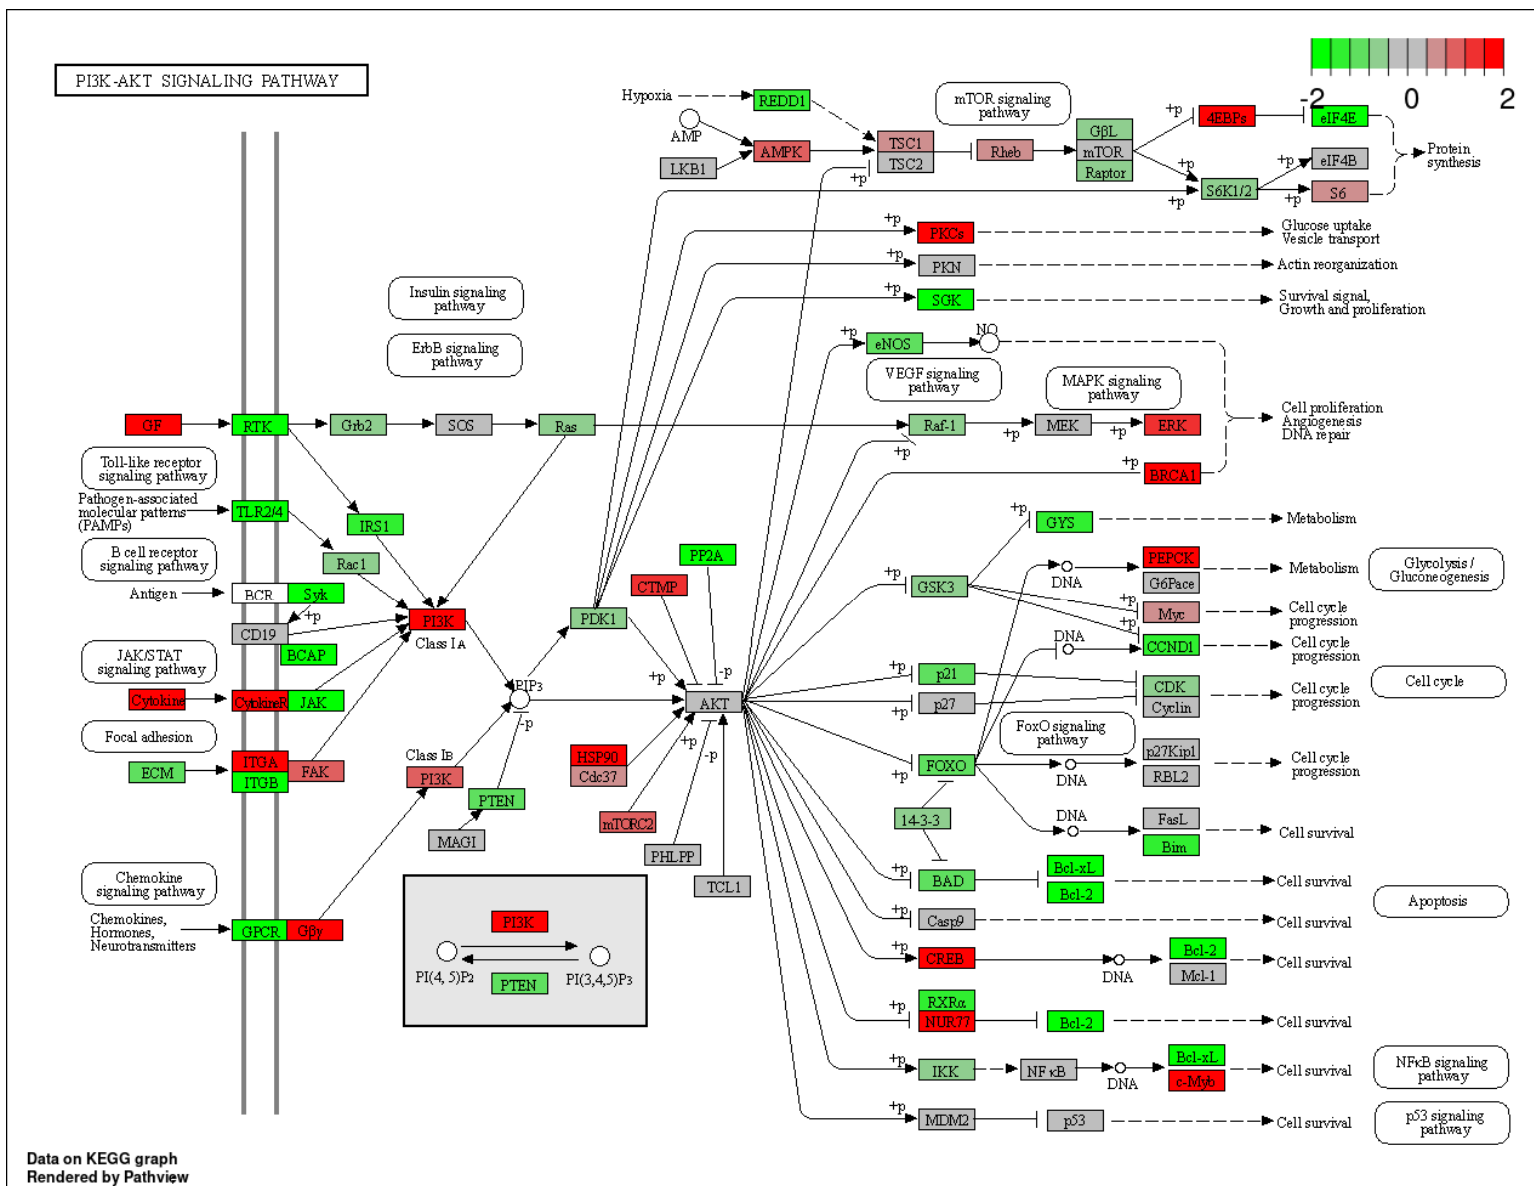**H**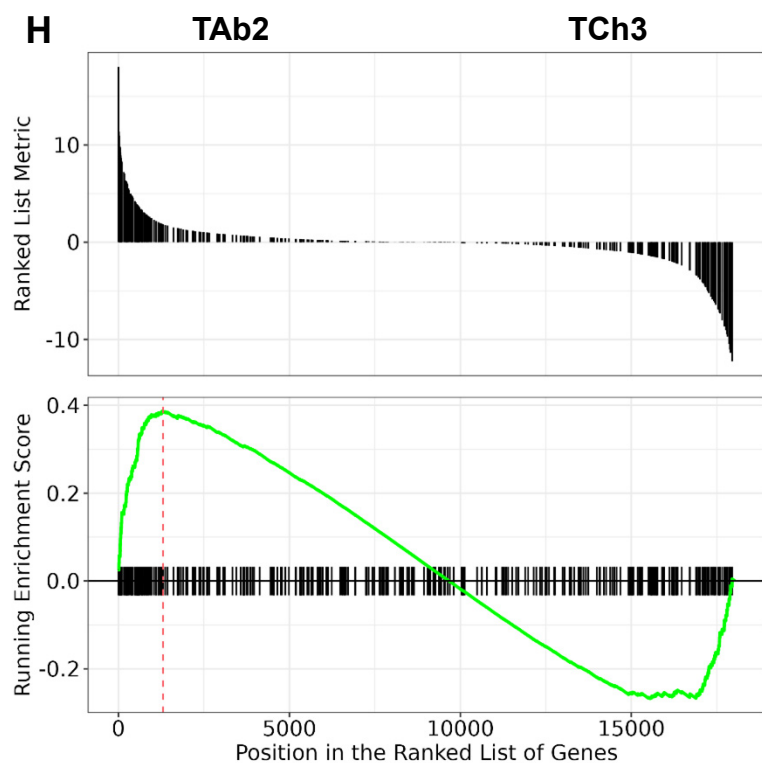**Figure S6G, H**

**Figure S6. Gene Set Enrichment Analysis (GSEA) using KEGG pathway depicts transcriptional profiles of negatively or positively enriched in TAb2 and TCh3 tumor cells. (A)** The bar graph shows top 20 enriched KEGG pathways labeled on the y-axis with gene count (number of genes in the specific pathway from the output data of DESeq) on the x-axis and color-coded according to the adjusted p-value. **(B)** The Gene-Concept network plot shows the genes that are involved in the top three most significant pathways. The Gene-Concept Network depicts the linkages of genes and biological concepts as a network. The pathway circle size corresponds to the number of genes, while the genes themselves are color coded to reflect the fold change. **(C-H)** GSEA plots showing enrichment of protein processing in endoplasmic reticulum **(C, D)**, ribosome **(E, F)**, and PI3K-Akt signaling pathway **(G, H)**. To further assess the three most significant pathways, genes involved in each pathway is shown (C, E, and G). An enrichment score is calculated which represents the degrees to which a set of genes is over-represented at the top or bottom of the ranked list (D, F, and H). The green curve corresponds to the ES (enrichment score) curve, which is the running sum of the weighted ES obtained from GSEA software.

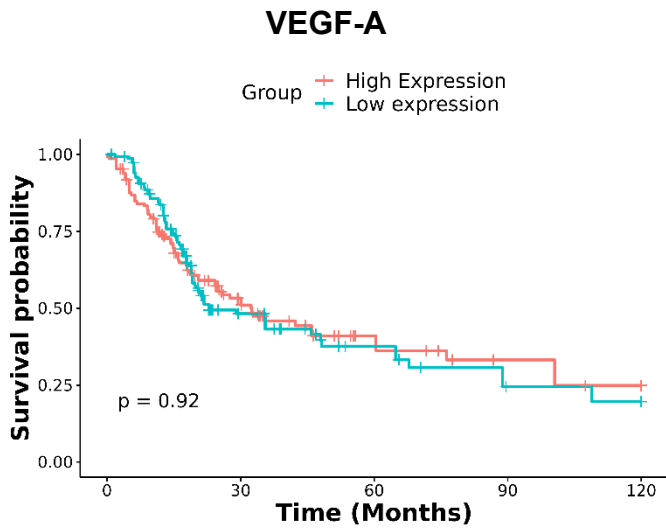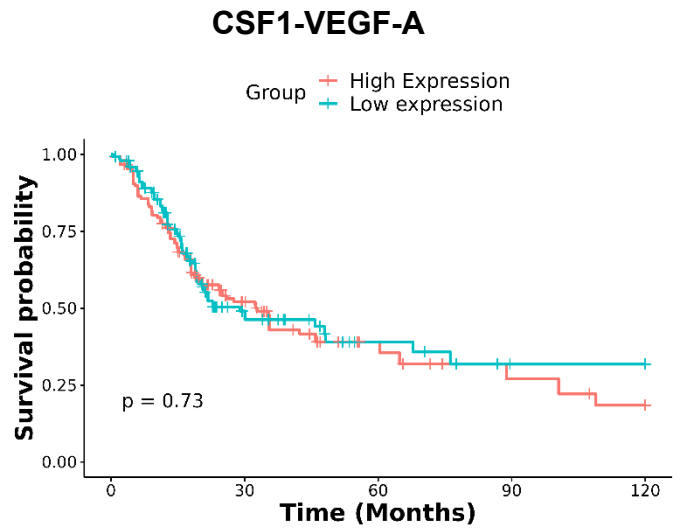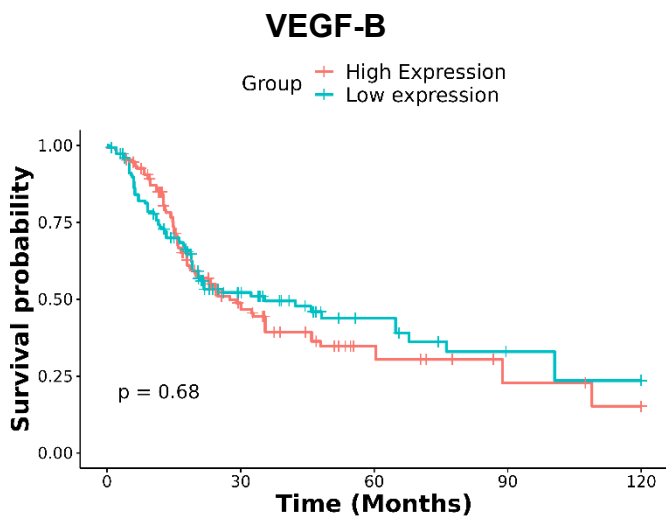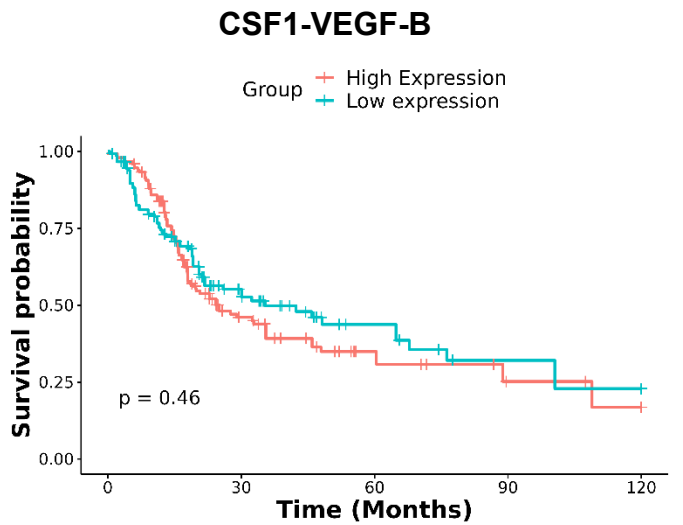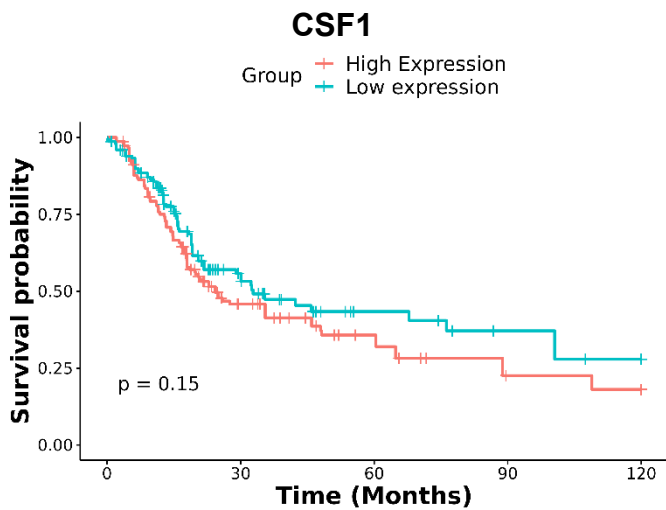

**Figure S7. Survival curves for HNSCC patients expressing different levels of CSF1 and/or VEGF.** 10-year survival Kaplan-Meier plots of HNSCC patients who had both  $PIK3CA^{Amp}$  and  $TP53^{Mutated}$  ( $n = 300$ ). Patients were grouped into high-expression group or low-expression group based on gene expression as described in Methods.

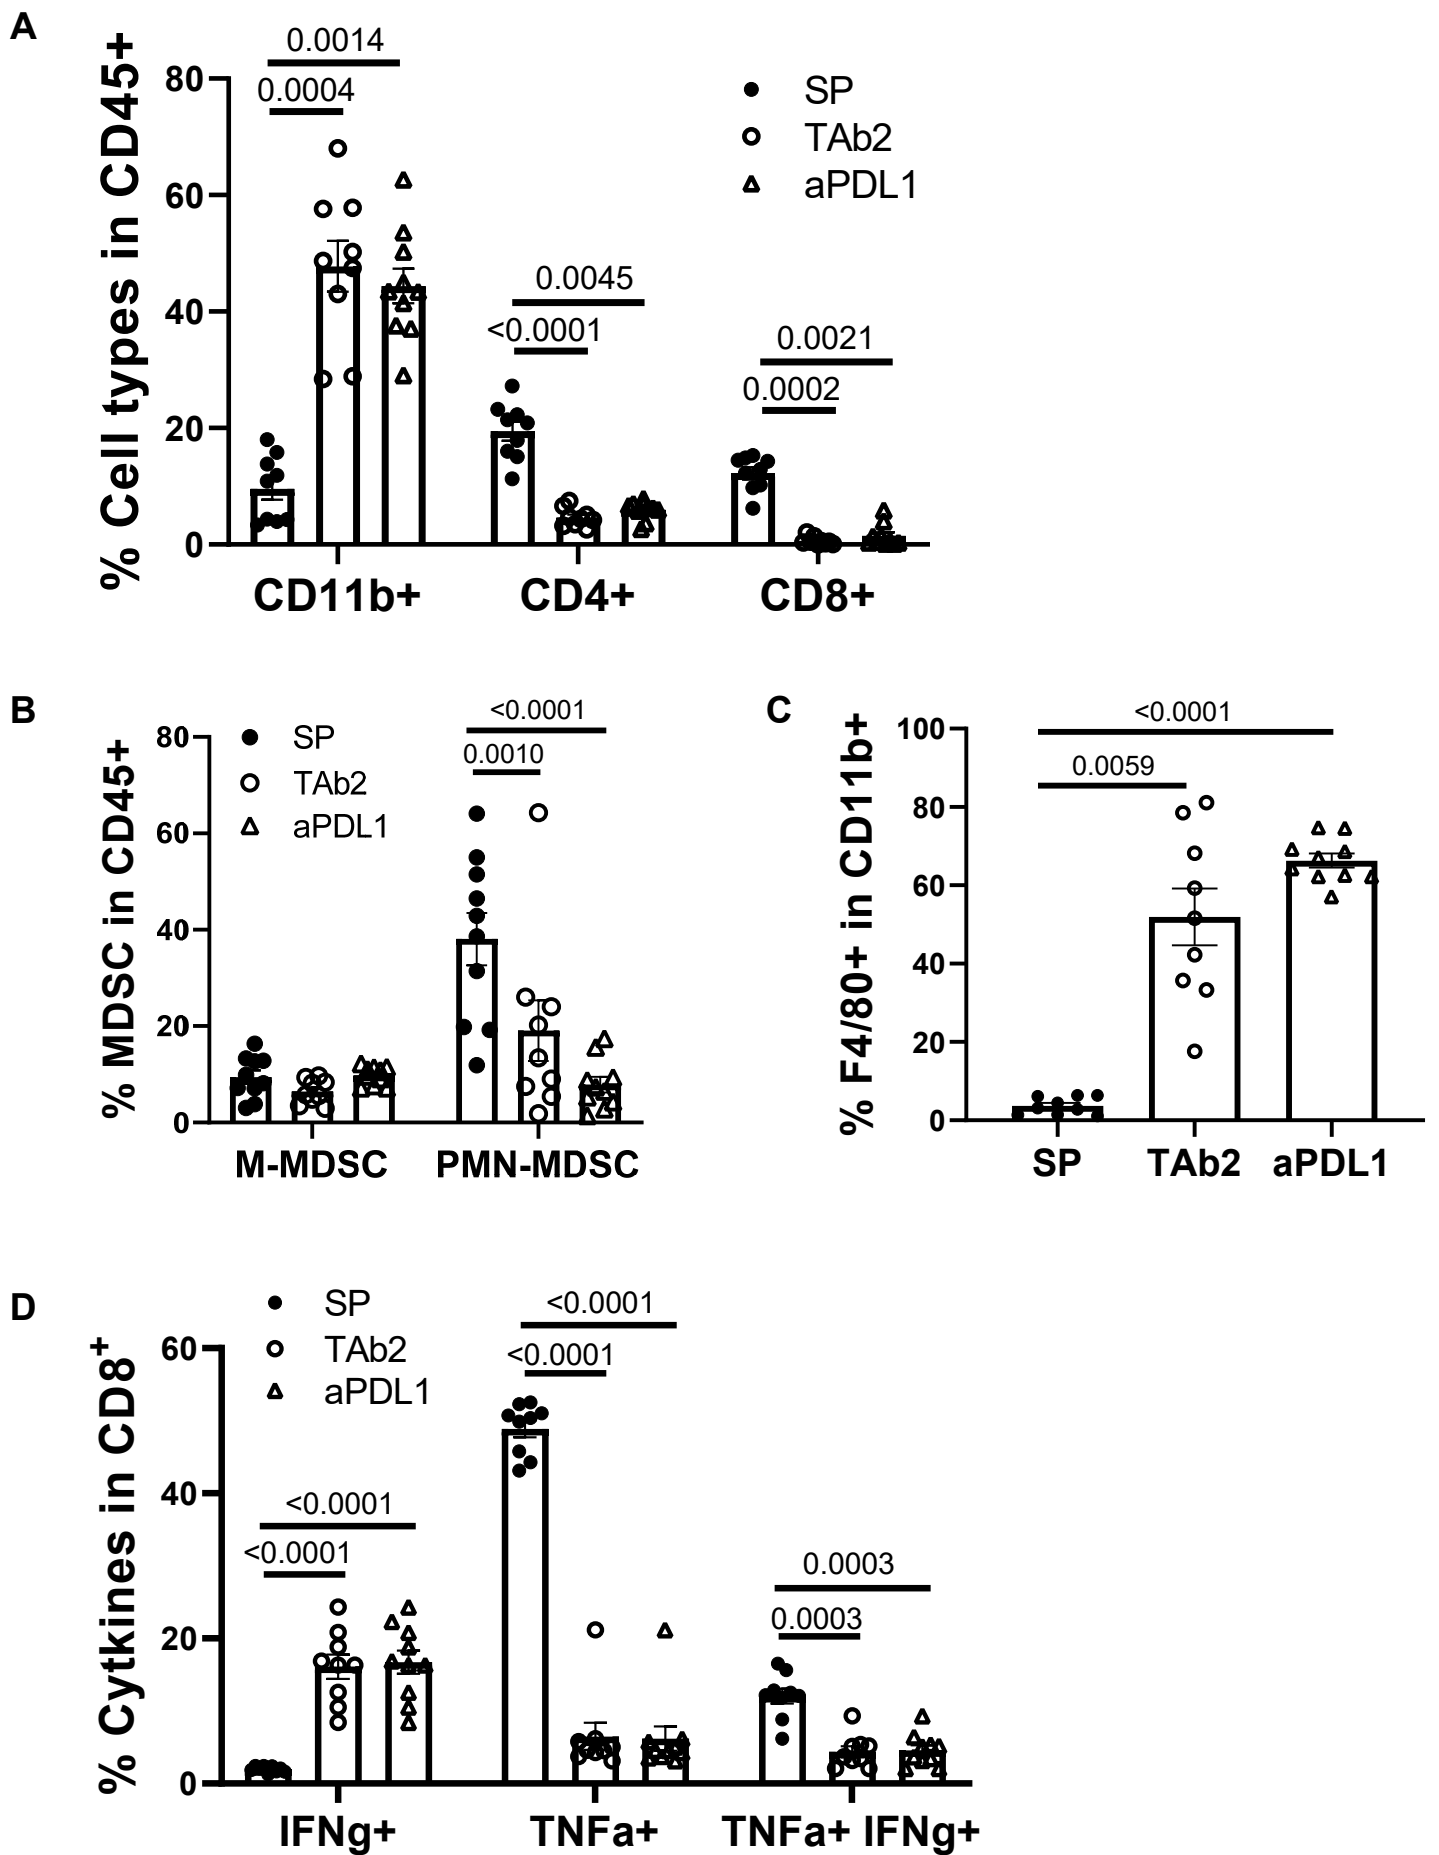

Figure S8

**Figure S8. Flow cytometry analysis confirmed that anti-PD-L1 treatment did not affect the cell types present in the TME of TAb2 tumors and tumor-infiltrating CD8 T cell function compared to control TAb2 tumors.** Flow cytometry was performed for spleens (n=9), or the tumor-infiltrating immune cells from TAb2 VC (n=9) and TAb2 anti-PD-L1 (n=10) tumors for all panels. TAb2 tumor cells ( $0.5 \times 10^6$ ) were injected s.c., and tumors were harvested on Day 21 post-injection. **(A)** Quantification of the percentage of CD11b<sup>+</sup>, CD4<sup>+</sup>, or CD8<sup>+</sup> cells in CD45<sup>+</sup> population. Statistical significance was calculated using two-way ANOVA with Tukey's multiple comparison test. **(B)** Quantification of the percentages of MDSCs. M-MDSC (CD11b<sup>+</sup>Ly6G<sup>-</sup>Ly6C<sup>high</sup>) and PMN-MDSC (CD11b<sup>+</sup>Ly6G<sup>+</sup>Ly6C<sup>low</sup>). **(C)** Quantification of the percentages of TAMs (CD11b<sup>+</sup>Ly6G<sup>-</sup>Ly6C<sup>-</sup>F4/80<sup>+</sup>) in spleen, TAb2 control and TAb2-anti-PD-L1 treated tumors. *P* values are shown for Tukey's multiple comparisons by two-way ANOVA (MDSCs) and one-way ANOVA (TAMs). **(D)** Frequencies of the CD8<sup>+</sup> T cells producing single or double cytokines (IFN $\gamma$ <sup>+</sup>, TNF $\alpha$ <sup>+</sup>, and IFN $\gamma$ <sup>+</sup>TNF $\alpha$ <sup>+</sup>) in response to *ex vivo* stimulation. *P* values are shown for Tukey's multiple comparisons by two-way ANOVA.

| Figure 2A              |  |          |
|------------------------|--|----------|
| CD11b <sup>+</sup>     |  | P-values |
| SPLEEN (TCh3) vs. Tab2 |  | <0.0001  |
| SPLEEN (TCh3) vs. TCh3 |  | <0.0001  |
| Tab2 vs. TCh3          |  | 0.0053   |
| CD4 <sup>+</sup>       |  | P-values |
| SPLEEN (TCh3) vs. Tab2 |  | 0.0034   |
| SPLEEN (TCh3) vs. TCh3 |  | >0.9999  |
| Tab2 vs. TCh3          |  | 0.0030   |
| CD8 <sup>+</sup>       |  | P-values |
| SPLEEN (TCh3) vs. Tab2 |  | 0.0024   |
| SPLEEN (TCh3) vs. TCh3 |  | >0.9999  |
| Tab2 vs. TCh3          |  | 0.0091   |

  

| Figure 2C       |  |          |
|-----------------|--|----------|
| M-MDSC          |  | P-values |
| Spleen vs. Tab2 |  | 0.7025   |
| Spleen vs. TCh3 |  | 0.1298   |
| Tab2 vs. TCh3   |  | 0.4346   |
| PNM-MDSC        |  | P-values |
| Spleen vs. Tab2 |  | 0.038    |
| Spleen vs. TCh3 |  | 0.5895   |
| Tab2 vs. TCh3   |  | 0.2843   |
| F4/80           |  | P-values |
| Spleen vs. Tab2 |  | <0.0001  |
| Spleen vs. TCh3 |  | 0.4327   |
| Tab2 vs. TCh3   |  | <0.0001  |

  

| Figure 2E                            |  |          |
|--------------------------------------|--|----------|
| CD206 <sup>+</sup> CD86 <sup>+</sup> |  | P-values |
| Spleen vs. Tab2                      |  | 0.9581   |
| Spleen vs. TCh3                      |  | 0.1414   |
| Tab2 vs. TCh3                        |  | 0.2111   |
| CD206 <sup>+</sup> CD86 <sup>-</sup> |  | P-values |
| Spleen vs. Tab2                      |  | <0.0001  |
| Spleen vs. TCh3                      |  | <0.0001  |
| Tab2 vs. TCh3                        |  | <0.0001  |
| CD206 <sup>-</sup> CD86 <sup>+</sup> |  | P-values |
| Spleen vs. Tab2                      |  | 0.0099   |
| Spleen vs. TCh3                      |  | 0.8605   |
| Tab2 vs. TCh3                        |  | 0.0403   |

  

| Figure 2G                                           |  |          |
|-----------------------------------------------------|--|----------|
| IFN $\gamma$ <sup>+</sup>                           |  | P-values |
| SPLEEN (TCh3) vs. Tab2                              |  | <0.0001  |
| SPLEEN (TCh3) vs. TCh3                              |  | <0.0001  |
| Tab2 vs. TCh3                                       |  | 0.0115   |
| TNF $\alpha$ <sup>+</sup>                           |  | P-values |
| SPLEEN (TCh3) vs. Tab2                              |  | <0.0001  |
| SPLEEN (TCh3) vs. TCh3                              |  | <0.0001  |
| Tab2 vs. TCh3                                       |  | 0.8422   |
| TNF $\alpha$ <sup>+</sup> IFN $\gamma$ <sup>+</sup> |  | P-values |
| SPLEEN (TCh3) vs. Tab2                              |  | 0.2604   |
| SPLEEN (TCh3) vs. TCh3                              |  | 0.0066   |
| Tab2 vs. TCh3                                       |  | <0.0001  |

  

| Figure 8B          |  |          |
|--------------------|--|----------|
| CD11b <sup>+</sup> |  | P-values |
| aPDL1 vs. TCh3     |  | >0.9999  |
| aPDL1 vs. SP       |  | 0.0022   |
| TCh3 vs. SP        |  | <0.0001  |
| CD4 <sup>+</sup>   |  | P-values |
| aPDL1 vs. TCh3     |  | >0.9999  |
| aPDL1 vs. SP       |  | 0.0031   |
| TCh3 vs. SP        |  | 0.0182   |
| CD8 <sup>+</sup>   |  | P-values |
| aPDL1 vs. TCh3     |  | 0.0058   |
| aPDL1 vs. SP       |  | 0.6974   |
| TCh3 vs. SP        |  | <0.0001  |

  

| Figure S5A                                    |  |          |
|-----------------------------------------------|--|----------|
| F4/80 <sup>+</sup> in CD11b                   |  | P-values |
| BM (media only) vs. Tab2 BM (media only)      |  | <0.0001  |
| BM (media only) vs. TCh3 BM (media only)      |  | 0.1320   |
| Tab2 BM (media only) vs. TCh3 BM (media only) |  | <0.0001  |

  

| Figure S5B                                    |  |          |
|-----------------------------------------------|--|----------|
| CD11b <sup>+</sup> CD11c <sup>+</sup> in CD45 |  | P-values |
| BM (media only) vs. Tab2 BM (media only)      |  | 0.6371   |
| BM (media only) vs. TCh3 BM (media only)      |  | 0.0011   |
| Tab2 BM (media only) vs. TCh3 BM (media only) |  | 0.0084   |

  

| Figure S5C                                    |  |          |
|-----------------------------------------------|--|----------|
| CD11b <sup>+</sup> in CD45                    |  | P-values |
| BM (media only) vs. Tab2 BM (media only)      |  | <0.0001  |
| BM (media only) vs. TCh3 BM (media only)      |  | <0.0001  |
| Tab2 BM (media only) vs. TCh3 BM (media only) |  | <0.0001  |

  

| Figure S5D                                    |  |          |
|-----------------------------------------------|--|----------|
| M-MDSC in CD11b                               |  | P-values |
| BM (media only) vs. Tab2 BM (media only)      |  | <0.0001  |
| BM (media only) vs. TCh3 BM (media only)      |  | <0.0001  |
| Tab2 BM (media only) vs. TCh3 BM (media only) |  | 0.9967   |

  

| Figure S5E                                    |  |          |
|-----------------------------------------------|--|----------|
| PMN-MDSC in CD11b                             |  | P-values |
| BM (media only) vs. Tab2 BM (media only)      |  | 0.5874   |
| BM (media only) vs. TCh3 BM (media only)      |  | <0.0001  |
| Tab2 BM (media only) vs. TCh3 BM (media only) |  | <0.0001  |

  

| Figure S8A         |  |          |
|--------------------|--|----------|
| CD11b <sup>+</sup> |  | P-values |
| Spleen vs. Tab2    |  | 0.0004   |
| Spleen vs. aPDL1   |  | 0.0014   |
| Tab2 vs. aPDL1     |  | >0.9999  |
| CD4 <sup>+</sup>   |  | P-values |
| Spleen vs. Tab2    |  | <0.0001  |
| Spleen vs. aPDL1   |  | 0.0045   |
| Tab2 vs. aPDL1     |  | 0.7918   |
| CD8 <sup>+</sup>   |  | P-values |
| Spleen vs. Tab2    |  | 0.0002   |
| Spleen vs. aPDL1   |  | 0.0021   |
| Tab2 vs. aPDL1     |  | >0.9999  |

  

| Figure S8B       |  |          |
|------------------|--|----------|
| M-MDSC           |  | P-values |
| Tab2 vs. aPDL1   |  | 0.7835   |
| Tab2 vs. Spleen  |  | 0.8203   |
| aPDL1 vs. Spleen |  | 0.9974   |
| PMN-MDSC         |  | P-values |
| Tab2 vs. aPDL1   |  | 0.0701   |
| Tab2 vs. Spleen  |  | 0.001    |
| aPDL1 vs. Spleen |  | <0.0001  |

  

| Figure S8C       |  |          |
|------------------|--|----------|
| F4/80            |  | P-values |
| Spleen vs. Tab2  |  | 0.0059   |
| Spleen vs. aPDL1 |  | <0.0001  |
| Tab2 vs. aPDL1   |  | 0.9439   |

  

| Figure S8D                                          |  |          |
|-----------------------------------------------------|--|----------|
| IFN $\gamma$ <sup>+</sup>                           |  | P-values |
| Spleen vs. Tab2                                     |  | <0.0001  |
| Spleen vs. aPDL1                                    |  | <0.0001  |
| Tab2 vs. aPDL1                                      |  | 0.9396   |
| TNF $\alpha$ <sup>+</sup>                           |  | P-values |
| Spleen vs. Tab2                                     |  | <0.0001  |
| Spleen vs. aPDL1                                    |  | <0.0001  |
| Tab2 vs. aPDL1                                      |  | 0.9858   |
| TNF $\alpha$ <sup>+</sup> IFN $\gamma$ <sup>+</sup> |  | P-values |
| Spleen vs. Tab2                                     |  | 0.0003   |
| Spleen vs. aPDL1                                    |  | 0.0003   |
| Tab2 vs. aPDL1                                      |  | 0.9932   |

**Figure S9. Detailed P-values for figures. (A)** Statistical significance was calculated using Kruskal-Wallis test for Figure 2A and Two-way ANOVA for Figures 2C, E and G. **(B)** Statistical significance was calculated for Figure 8B using Two-way ANOVA. **(C)** Statistical significance for Figure S5 Day 4 time point was calculated using Two-way ANOVA. **(D)** Statistical significance was calculated using Kruskal-Wallis test for Figure S8A and Two-way ANOVA for Figures S8B-D.
